# Supplementary material for: Dual Molecules Targeting 5-HT6 and GABA-A Receptors as a New Approach to Combat Depression Associated with Neuroinflammation
Source: PubMed Central journal article supplement (PMC10119930; doi:10.1021/acschemneuro.3c00033), 2023-04-04
Supplement: cn3c00033_si_001.pdf [file cn3c00033_si_001.pdf]

# Supporting Information

## **Dual molecules targeting 5-HT<sub>6</sub> and GABA-A receptors as a new approach to combat depression associated with neuroinflammation**

Monika Marcinkowska,<sup>\*a</sup> Barbara Mordyl,<sup>a</sup> Agata Siwek,<sup>a</sup> Monika Głuch-Lutwin,<sup>a</sup> Tadeusz Karcz, Alicja Gawalska,<sup>a</sup> Michał Sapa,<sup>a</sup> Katarzyna Szafrńska,<sup>a</sup> Bartosz Pomierny,<sup>a</sup> Karolina Pytka,<sup>a</sup> Magdalena Kotańska,<sup>a</sup> Kamil Mika,<sup>a</sup> Marcin Kolaczowski<sup>a,b</sup>

<sup>a</sup>Jagiellonian University Medical College, Faculty of Pharmacy, 9 Medyczna St., 30-688 Krakow, Poland

<sup>b</sup>Adamed Pharma S.A., Pienkow, 6A Mariana Adamkiewiczza St., 05-152, Czosnow, Poland

\*Corresponding Author Information:

Phone: (+48)126205460

E-mail: monika.marcinkowska@uj.edu.pl

## 1. NMR and UPLC-UV-MS spectra of selected compounds

### 2-(4-(3-(benzyloxy)-2-methylphenyl)piperazin-1-yl)ethan-1-ol (6)

#### <sup>1</sup>H NMR (500 MHz, CHLOROFORM-d)

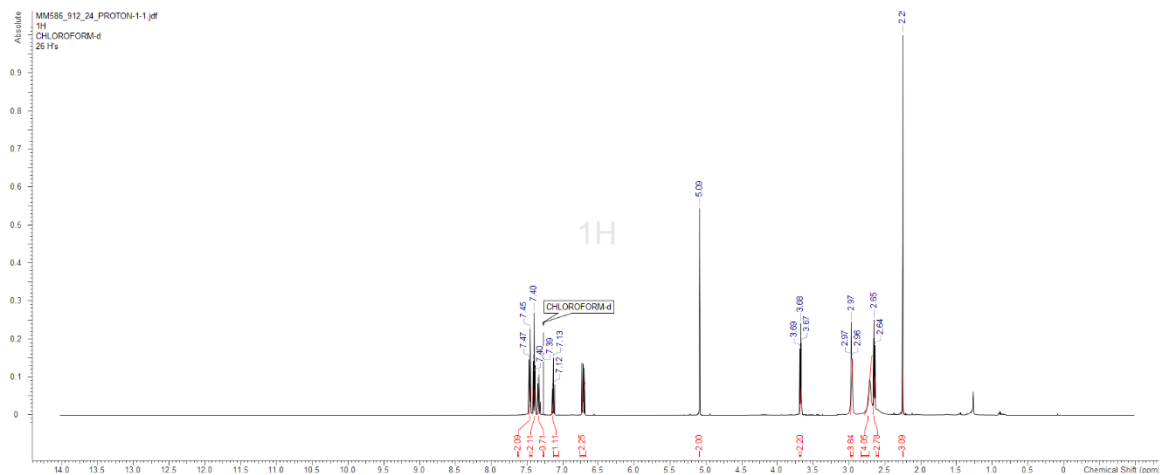

#### <sup>13</sup>C NMR (126 MHz, CHLOROFORM-d)

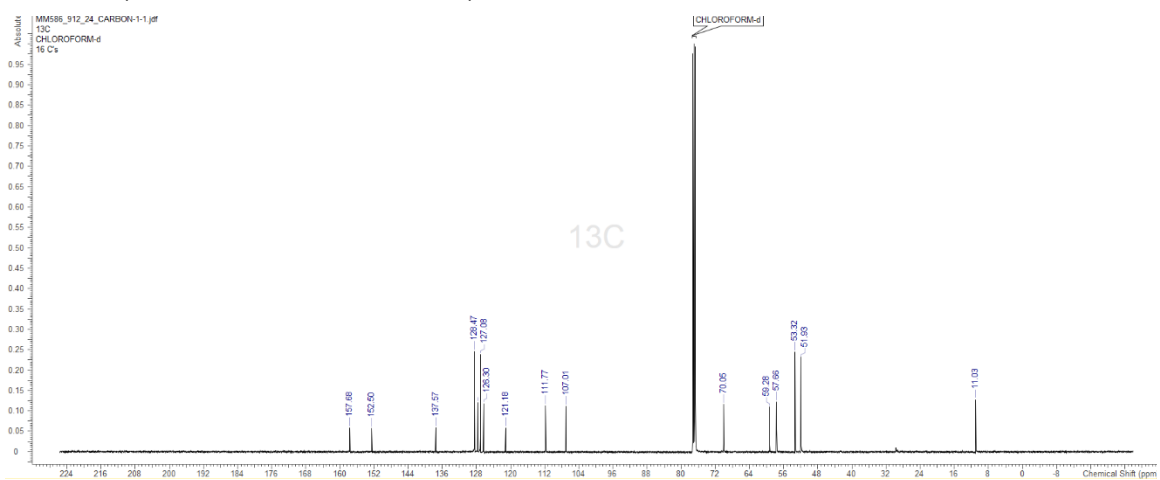

# 1-(2-((4-ammoniobutanoyl)oxy)ethyl)-4-(3-(benzyloxy)-2-methylphenyl)piperazin-1-ium dichloride (16)

<sup>1</sup>H NMR (300 MHz, DMSO-d<sub>6</sub>)

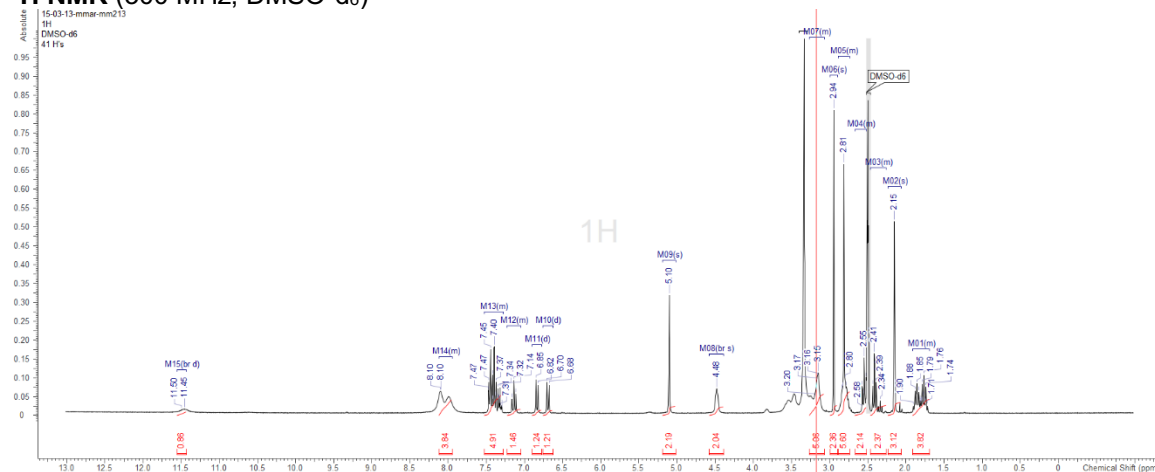

<sup>13</sup>C NMR (75 MHz, DMSO-d<sub>6</sub>)

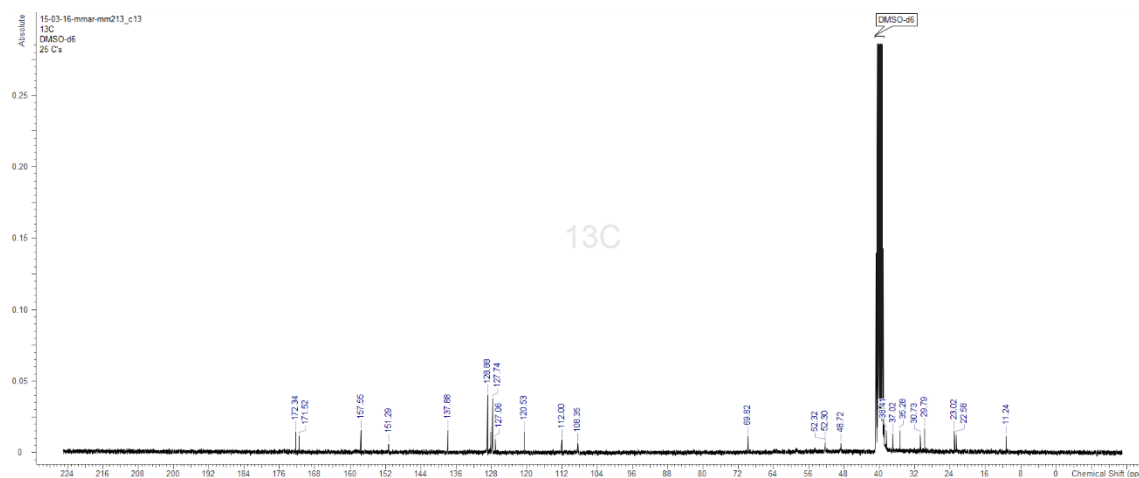

## 2. Predicted binding modes of selected molecules

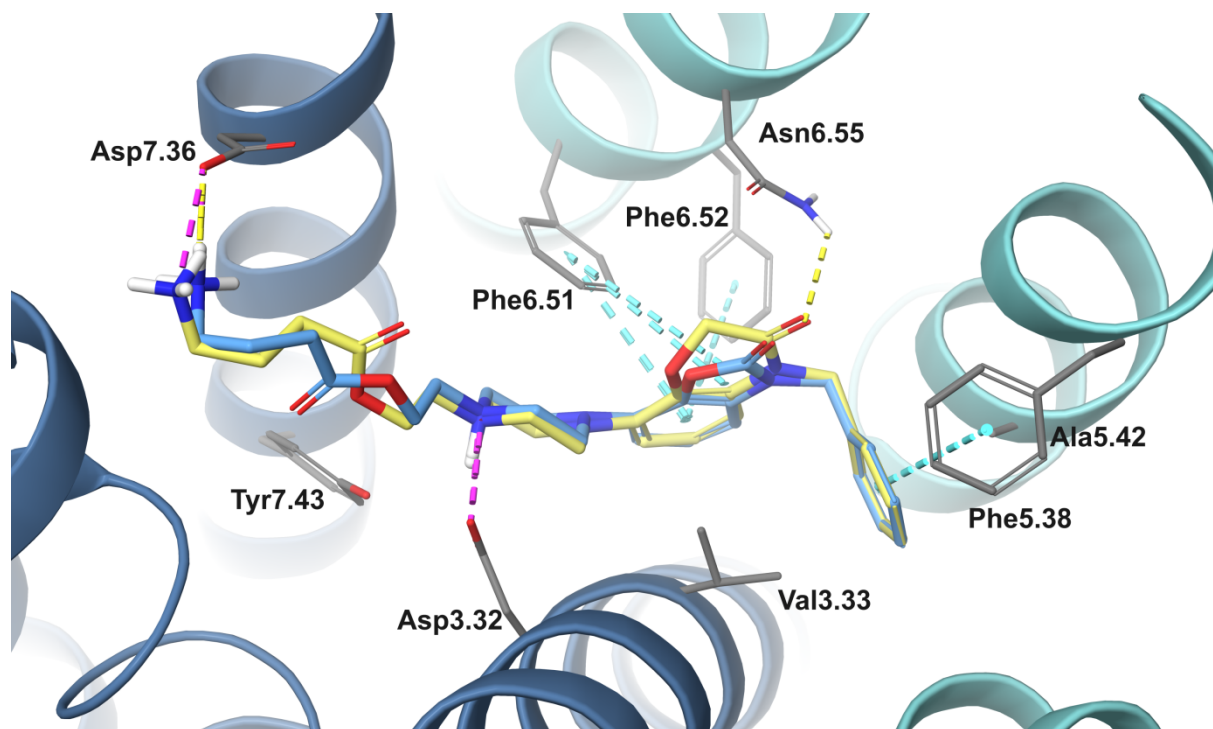

**Figure S1.** The predicted binding mode of hybrids **18** (blue) and **19** (yellow) at the binding site of 5-HT<sub>6</sub> receptor. Both ligands were aligned and formed crucial interactions – the ionic bond with Asp3.32 and  $\pi$ - $\pi$  stackings with Phe6.51/Phe6.52 residues. The benzyl moieties formed  $\pi$ - $\pi$  stackings with Phe5.38 in a hydrophobic pocket between Val3.33 and Ala5.42 residues. The extra carbon atom in the heterocyclic fragment of **19** changed the arrangement of the carbonyl group, leading to the formation of an important hydrogen bond with Asn6.55 side chain. This is believed to result in a 5-fold higher affinity of hybrid **19** ( $K_i = 25.0 \pm 1.0$ ) compared to **18** ( $K_i = 130.0 \pm 12.0$  nM). GABA-fragments occupied the site between TMH1, TMH2 and TMH7, forming ionic interactions with Asp7.36 by protonated amine groups.

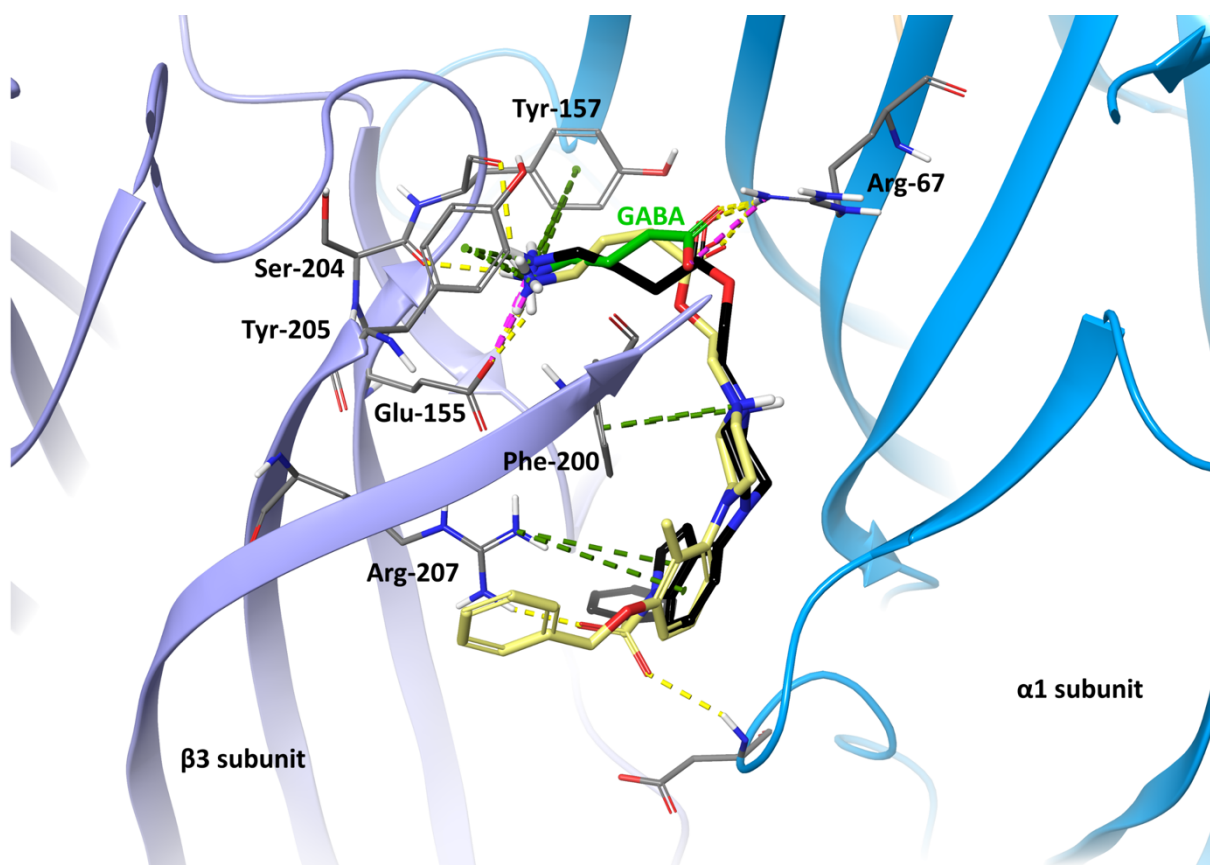

**Figure S2.** The predicted binding modes of hybrid **16** at the active site of the GABA-A receptor in comparison to the hybrid **3B**, the 1-(phenylsulfonyl)-4-(piperazin-1-yl)-1H-indazole derivative with high 5-HT<sub>6</sub> receptor and GABA-A receptor agonistic activity (light yellow–16; green–GABA; black – 3B). The acyl fragments of both hybrids adopted a similar binding pose to the natural agonist in the GABA-A receptor and their analogous protonated piperazine rings formed cation- $\pi$  interactions with  $\beta$ 3Phe-200. The 1-(phenylsulfonyl)-1H-indazole moiety of hybrid **3B** created additional interactions with possibly significant  $\beta$ 3Arg-207 residue: hydrogen bond interactions (sulfonyl group) with  $\beta$ 3Arg-207 and cation- $\pi$  interactions, as well as  $\alpha$ 1Asp-184 (hydrogen bond with sulfonyl group). However, in the case of hybrid 16, only the cation- $\pi$  interaction with  $\beta$ 3Arg-207 (2-methylphenyl ring) was preserved.

### 3. Hepatotoxicity assay

**Table 1.** The viability of cells

| CONCENTRATION | 100 $\mu$ M |    | 50 $\mu$ M |    | 10 $\mu$ M |    | 1 $\mu$ M |    | 0,1 $\mu$ M |    |
|---------------|-------------|----|------------|----|------------|----|-----------|----|-------------|----|
|               | MEAN        | CV | MEAN       | CV | MEAN       | CV | MEAN      | CV | MEAN        | CV |
| <b>16</b>     | 14%         | 2% | 102%       | 0% | 104%       | 0% | 102%      | 0% | 100%        | 0% |

MEAN – The value are expressed as percentage of control (live cells).

CV- % Coefficient of variation
